# Supplementary material for: Prognostic factors in neuroendocrine carcinoma: biological markers are more useful than histomorphological markers
Source: PubMed Central journal article supplement (PMC5225444; doi:10.1038/srep40609), 2017-01-11
Supplement: srep40609-s1.pdf [file srep40609-s1.pdf]

**Prognostic factors in neuroendocrine carcinoma: biological markers are more useful than histomorphological markers**

Patricia Freis<sup>1,5,6</sup>, Emmanuelle Graillet<sup>2</sup>, Pascal Rousset<sup>3</sup>, Valérie Hervieu<sup>1</sup>, Laurence Chardon<sup>4</sup>, Catherine Lombard-Bohas<sup>2</sup>, Thomas Walter<sup>2,5</sup>

**Supplementary Table 1.** Assessment of biochemical analysis.

|                        |                                                           | Technical or Substrate                                               | Unit    | Upper limit of normal |
|------------------------|-----------------------------------------------------------|----------------------------------------------------------------------|---------|-----------------------|
| <b>CgA</b>             | CisBio, 2004-2016                                         | radioimmunoassay                                                     | µg/L    | 98                    |
| <b>NSE</b>             | Thermofisher Brahms (Kryptor), 2003-2016                  | immunofluorescent assay                                              | µg/L    | 12.5                  |
| <b>LDH</b>             | Roche (Modular), 2002-2011<br>Siemens (Vista), 2011-2016* | lactate (IFCC recommended)                                           | IU/L    | 241                   |
| <b>ASAT</b>            | Roche (Modular), 2002-2011<br>Siemens (Vista), 2011-2016* | with pyridoxal 5 phosphate (IFCC recommended)                        | IU/L    | 35                    |
| <b>ALAT</b>            | Roche (Modular), 2002-2011<br>Siemens (Vista), 2011-2016* | with pyridoxal 5 phosphate (IFCC recommended)                        | IU/L    | 45                    |
| <b>ALP</b>             | Roche (Modular), 2002-2011<br>Siemens (Vista), 2011-2016* | p-nitrophenyl phosphate                                              | IU/L    | 136                   |
| <b>Total Bilirubin</b> | Roche (Modular), 2002-2011<br>Siemens (Vista), 2011-2016* | diazonium salt (phenyldiazonium)<br>diazonium salt (sulfanilic acid) | µmol /L | 17                    |
| <b>CRP</b>             | Roche (Modular), 2002-2011<br>Siemens (Vista), 2011-2016* | turbidimetry<br>nephelometry                                         | mg/L    | 3                     |
| <b>Albumin</b>         | Roche (Modular), 2002-2011<br>Siemens (Vista), 2011-2016* | turbidimetry<br>nephelometry                                         | g/L     | 35#                   |

# For albumin, we indicated the lower (not the upper) limit of the normal

\* There is no statistical difference between these processes, as they are based on the same method with the same substrate, and transferability was checked before each method evolution. We used the recommended method of the International Federation of Clinical Chemistry and Laboratory Medicine (IFCC).

Abbreviations: CgA, chromogranin A; NSE, Neuron-specific enolase; LDH, lactate dehydrogenase; AST, aspartate aminotransferase; ALP, alkaline phosphatase; ALT, alanin aminotransferase; CRP, C-reactive protein.
